# Supplementary material
Source: PubMed Central journal article supplement (PMC1767958)
Supplement: heart_89_11_1352__1.pdf [file heart_89_11_1352__1.pdf]

## Web-only References

1. Heberden W. A letter to Dr. Heberden, concerning the angina pectoris; and an account of the dissection of one who had been troubled with that disorder. Read at the college November 17, 1772. *Medical Transactions Published by the College of Physicians in London*. 1785;3:1-11.
2. Habib GB, Heibig J, Forman SA, Brown BG, Roberts R, Terrin ML, Bolli R. Influence of coronary collateral vessels on myocardial infarct size in humans. Results of phase I thrombolysis in myocardial infarction (TIMI) trial. The TIMI Investigators. *Circulation*. 1991;83:739-746.
3. Helfant RH, Vokonas PS, Gorlin R. Functional importance of the human coronary collateral circulation. *N Engl J Med*. 1971;284:1277-1281.
4. Pitt B. Interarterial coronary anastomoses. Occurrence in normal hearts and in certain pathologic conditions. *Circulation*. 1959;20:816-822.
5. Reimer KA, Ideker RE, Jennings RB. Effect of coronary occlusion site on ischemic bed size and collateral blood flow in dogs. *Cardiovasc Res*. 1981;15:668-674.
6. Demer LL, Gould KL, Goldstein RA, Kirkeeide RL. Noninvasive assessment of coronary collaterals in man by PET perfusion imaging. *J Nucl Med*. 1990;31:259-270.
7. de Marchi S, Schwerzmann M, Fleisch M, Billinger M, Meier B, Seiler C. Quantitative contrast echocardiographic assessment of collateral derived myocardial perfusion during elective coronary angioplasty. *Heart*. 2001;86:324-329.
8. Melidonis A, Tournis S, Kouvaras G, Baltaretsou E, Hadanis S, Hajissavas I, Tsatsoulis A, Foussas S. Comparison of coronary collateral circulation in diabetic and nondiabetic patients suffering from coronary artery disease. *Clin Cardiol*. 1999;22:465-71.
9. Abaci A, Oguzhan A, Kahraman S, Eryol NK, Uenal S, Arinc H, Ergin A. Effect of diabetes mellitus on formation of coronary collateral vessels. *Circulation*. 1999;99:2239-2242.
10. Waltenberger J, Lange J, Kranz A. Vascular endothelial growth factor-A-induced chemotaxis of monocytes is attenuated in patients with diabetes mellitus: A potential predictor for the individual capacity to develop collaterals. *Circulation*. 2000;102:185-90.
11. Van Belle E, Rivard A, Chen D, Silver M, Bunting S, Ferrara N, Symes JF, Bauters C, Isner JM. Hypercholesterolemia attenuates angiogenesis but does not preclude augmentation by angiogenic cytokines. *Circulation*. 1997;96:2667-74.
12. Boengler K, Pipp F, Broich K, Fernandez B, Schaper W, Deindl E. Identification of differentially expressed genes like cofilin2 in growing collateral arteries. *Biochem Biophys Res Commun*. 2003;17:751-756.
13. Piek JJ, van Liebergen AM, Koch KT, de Winter RJ, Peters RJG, David GK. Pharmacological modulation of the human collateral vascular resistance in acute and chronic coronary occlusion assessed by

- intracoronary blood flow velocity analysis in an angioplasty model. *Circulation*. 1997;96:106-115.
14. Werner G, Richartz B, Gastmann O. Immediate changes of collateral function after successful recanalization of chronic total coronary occlusions. *Circulation*. 2000;102:2959-2965.
  15. Wahl A, Billinger M, Fleisch M, Meier B, Seiler C. Quantitatively assessed coronary collateral circulation and restenosis following percutaneous revascularization. *Eur Heart J*. 2000;21:1776-1784.
  16. Klassen CL, Traverse JH, Bache RJ. Nitroglycerin dilates coronary collateral vessels during exercise after blockade of endogenous NO production. *Am J Physiol*. 1999;277:H918-23.
  17. Risau W. Mechanisms of angiogenesis. *Nature*. 1997;386:671-674.
  18. Arras M, Scholz D, Winkler B, Schaper J, Schaper W. Monocyte activation in angiogenesis and collateral growth in the rabbit hindlimb. *J Clin Invest*. 1998;40-50.
  19. Polverini PJ, Cotran RS, Gimbrone MA, Unanue ER. Activated macrophages induce vascular proliferation. *Nature*. 1977;269:804-806.
  20. Hendel RC, Henry TD, Rocha-Singh K, Isner JM, Kereiakes DJ, Giordano F, Simons M, Bonow RO. Effect of intracoronary recombinant human vascular endothelial growth factor on myocardial perfusion. *Circulation*. 2000;101:118-121.
  21. Laham RJ, Chronos NA, Pike M, Leimbach ME, Udelson JE, Pearlman JD, Pettigrew RI, Whitehouse MJ, Yoshizawa C, Simons M. Intracoronary basic fibroblast growth factor (FGF-2) in patients with severe ischemic heart disease: results of a phase I open-label dose escalation study. *J Am Coll Cardiol*. 2000;36:2132-2139.
  22. Schaper W, Ito WD. Molecular Mechanisms of Coronary Collateral Vessel Growth. *Circ Res*. 1996;79:911-919.
  23. Helisch A, Schaper W. Angiogenesis and arteriogenesis - not yet for prescription. *Z Kardiol*. 2000;89:239-244.
  24. Niebauer J, Hambrecht R, Marburger C, Hauer K, Velich T, von Hodenberg E, Schlierf G, Kubler W, Schuler G. Impact of intensive physical exercise and low-fat diet on collateral vessel formation in stable angina pectoris and angiographically confirmed coronary artery disease. *Am J Cardiol*. 1995;76:771-775.
  25. Zbinden R, Zbinden S, Windecker S, Meier B, Seiler C. Direct demonstration of coronary collateral growth by physical endurance exercise in a healthy marathon runner. *Circulation*. 2003. submitted
